# Supplementary material
Source: PubMed Central journal article supplement (PMC2390892)
Supplement: NIHMS46256-supplement-01.pdf [file NIHMS46256-supplement-01.pdf]

Supplemental Data

Cell, Volume 133

## **TGF $\beta$ Primes Breast Tumors for Lung Metastasis Seeding through Angiopoietin-like 4**

David Padua, Xiang H-F. Zhang, Qiongqing Wang, Cristina Nadal, William L. Gerald, Roger R. Gomis, and Joan Massagué

### **Experimental Procedures**

#### ***Cell culture and reagents***

HaCaT were maintained in DMEM medium supplemented with 10% fetal bovine serum (FBS), penicillin, streptomycin, and fungizone. MCF-10A cells were maintained in a 1:1 mixture of DMEM and Ham's F12 supplemented with 5% horse serum, 10  $\mu\text{g/ml}$  insulin (Sigma), 0.5  $\mu\text{g/ml}$  hydrocortisone (Sigma), 0.02  $\mu\text{g/ml}$  epidermal growth factor (Sigma), and antibiotics. HPL1 cells were maintained in Ham's F12 supplemented with 1% FBS, 5  $\mu\text{g/ml}$  insulin, 0.5  $\mu\text{g/ml}$  hydrocortisone, 5  $\mu\text{g/ml}$  transferrin (Sigma),  $2 \times 10^{-10}\text{M}$  triiodo thyronine, and antibiotics. All tumor cell lines were cultured in DMEM supplemented with 10% FBS, glutamine, penicillin, streptomycin and fungizone. The pleural effusion samples were centrifuged at 1,000 r.p.m. for 10 min, cell pellets were re-suspended in PBS and treated with ACK lysis buffer to lyse blood cells. A fraction of these cells underwent negative selection to remove leukocytes (CD45<sup>+</sup> and CD15<sup>+</sup> cells), and EpCam-positive cells were sorted from the population upon recovery in tissue culture for 24 h. Human vascular endothelial cells (HUVECs) (ScienCell) were cultured in complete ECM media (ScienCell) and used between passages 3–6. The retroviral packaging cell line GPG29 was maintained in DMEM containing 10% FBS supplemented with puromycin, G418, doxycycline, penicillin, streptomycin and fungizone. Transfections were done using standard protocols with Lipofectamine 2000 (Invitrogen). After transfection, GPG29 cells were cultured in DMEM containing 10% FBS.

#### ***RNA isolation, labeling, and microarray hybridization***

Methods for RNA extraction, labeling and hybridization for DNA microarray analysis of the cell lines have been described previously (Kang et al., 2003b; Minn et al., 2005). The EMC and MSK tumor cohorts and their gene expression data have been previously described (Minn et al., 2007; Minn et al., 2005; Wang et al., 2005). Bone or lung recurrence at any time is indicated.

The tissues for microarray analysis were obtained from therapeutic procedures performed as part of routine clinical management. Samples were snap-frozen in liquid nitrogen and stored at  $-80^{\circ}\text{C}$ . Each sample was examined histologically in cryostat sections stained with hematoxylin and eosin. Regions were dissected manually from the frozen block to provide a consistent tumor cell content of greater than 70% in tissues used for analysis. RNA was extracted from frozen tissues by homogenization in TRIzol reagent (Gibco/BRL) and evaluated for integrity. Complementary DNA was synthesized from total RNA by using a dT primer tagged with a T7 promoter. The RNA target was synthesized by transcription *in vitro* and labelled with biotinylated nucleotides (Enzo Biochem). The labeled target was assessed by hybridization to Test3 arrays (Affymetrix). All gene expression analysis was performed with an HG-U133A GeneChip (Affymetrix). Gene expression was quantified with MAS 5.0 or GCOS (Affymetrix). All studies involving patient materials or data were conducted under protocols approved by the Institutional Review Board of Memorial Sloan-Kettering Cancer Center, and that of the Hospital Clínic de Barcelona.

For the cell culture experiments, total RNA was prepared from  $5 \times 10^6$  cultured cells that were untreated or treated with TGF $\beta$ . Twenty-five micrograms of total RNA was used to prepare cRNA probe using a Custom Superscript Kit (Invitrogen) and the BioArray HighYield RNA Transcript Labeling Kit (Enzo). Each sample was hybridized with an Affymetrix Human Genome U133A microarray for 16 hr at  $45^{\circ}\text{C}$ .

### ***TGF $\beta$ response gene-expression signature and TBRS classifier***

To generate a TBRS classifier, we carried out a “meta-gene” analysis based on this gene set and using the cell lines as references (Bild et al., 2006) and references therein. In short, expression values of the 153 TGF $\beta$  responsive genes in cell lines were linearly transformed and encapsulated into one or two “Meta genes”. A Bayesian Probit model was then trained based the cell line data and applied to the Meta genes of the tumor samples. For each tumor, a number between 0 and 1 was derived, indicating the likelihood that the TGF $\beta$  signaling is active in that tumor.

### ***Generation of retrovirus and knockdown cells***

Viruses were collected 48 and 72 h after transfection, filtered, and concentrated by ultracentrifugation. Concentrated retrovirus was used to infect cells in the presence of  $8 \mu\text{g ml}^{-1}$  polybrene, typically resulting in a transduction rate of over 80%. Infected cells were selected

with puromycin or hygromycin. To generate knockdown-rescue cell lines, we used a similar method to produce virus encoding complementary DNAs for overexpression of the RNAi-targeted genes, along with a hygromycin or puromycin selectable marker. The overexpressing retrovirus vector, pBabe, was used to super-infect previously generated knockdown cells that were subsequently selected with either hygromycin or puromycin.

### ***Analysis of mRNA and protein expression***

Total RNA from subconfluent MDA-MB-231 cells was collected and purified using the RNeasy kit (Qiagen). Four-hundred nanograms of total purified RNA was subjected to a reverse transcriptase reaction according to the Hi-Capacity Archive kit (Applied Biosystems). cDNA corresponding to approximately 4 ng of starting RNA was used in three replicates for quantitative PCR. Indicated Taqman gene expression assays (Applied Biosystems) and the Taqman universal PCR master mix (Applied Biosystems) were used to quantify expression. Quantitative expression data were acquired and analyzed using an ABI Prism 7900HT Sequence Detection System (Applied Biosystems). For immunoblotting, we used previously described methods (Calonge and Massagué, 1999). Briefly, proteins were separated by SDS-PAGE and transferred to nitrocellulose membranes (Bio-Rad) that were immunoblotted with mouse monoclonal antibodies that recognize Smad4 (Cell Signaling) and  $\alpha$ -tubulin (Sigma). For analysis of secreted protein expression, cells were plated in triplicate at 90% confluency in 12-well plates, incubated in DMEM 0.2% FBS, and conditioned media was collected 72 h later. Media was cleared of cells by centrifuging at 2,000 r.p.m. for 5 min. Angptl4 concentrations were analyzed in conditioned media using an ELISA kits (BioVendor).

### ***Generation of retrovirus and knockdown cells***

Knockdown of *SMAD4* and *ANGPTL4* was achieved using pRetroSuper technology (Brummelkamp et al., 2002) targeting the following 19-nucleotide sequences: 5'-GGTGTGCAGTTGGAATGTA -3' (*SMAD4*) and 5'-GAGGCAGAGTGGACTATTT-3' (*ANGPTL4*). To produce retrovirus for knockdown, the hairpin vector was transfected into the GPG29 amphotropic packaging cell line (Ory et al., 1996).

### ***Immunostaining***

For visualizing lung metastases, mice were killed and perfused with PBS and 4% paraformaldehyde through the left ventricle. Lungs were fixed and paraffin-embedded.

Immunohistochemical staining for vimentin (Novocastra) was performed on paraffin-embedded lung sections by the MSKCC Molecular Cytology Core Facility. Brightfield microscopic images were collected using an AxioImager Z1 microscopy system (Zeiss).

### ***Immunofluorescence***

HUVECs were grown to confluence on fibronectin coated chamber slides (BD Biosciences). The cells were fixed for 10 min in 4% paraformaldehyde in PBS, and incubated for 5 min on ice in 0.5% Triton X-100 in PBS. After blocking with 2% BSA, the monolayers were processed for staining with anti-ZO1 (Zymed), anti-beta-catenin (Santa Cruz), rhodamine phalloidin (Molecular Probes) for F-actin staining and DAPI (Vector Labs) for nuclear staining. Fluorescence images were obtained using an AxioImager Z1 microscopy system (Zeiss).

### ***Animal studies***

For primary tumor analysis,  $5 \times 10^5$  viable single cells were re-suspended in a 1:1 mixture of PBS and growth-factor-reduced Matrigel (BD Biosciences) and injected orthotopically into both mammary gland number four in a total volume of 100 $\mu$ L as previously described (Minn et al., 2005). Primary tumor growth rates were analyzed by measuring tumour length ( $L$ ) and width ( $W$ ), and calculating tumor volume based on the formula  $\pi LW^2/6$ . For lung colonization assays,  $2 \times 10^5$  cells were re-suspended in 0.1 ml PBS and injected into the lateral tail vein. Lung metastatic progression was again monitored and quantified using bioluminescence. For bone metastasis, 30,000 cells in PBS were injected into the left ventricle of anaesthetized mice (100mg kg<sup>-1</sup> ketamine, 10 mg kg<sup>-1</sup> xylazine). For priming assays, cells were switched to low media (0.2% FBS) for 12 hours and then treated with 100pM of TGF $\beta$  for 6 hours. Mice were inoculated with 200,000 and 30,000 cells for lung and bone assays, respectively. Mice were imaged for luciferase activity immediately after injection to exclude any that were not successfully xenografted. Lymph node analysis was performed by ex vivo bioluminescent imaging of the peri-aortic lymph nodes.

### ***Intravasation assays***

Mice were perfused with 5 ml PBS through the left ventricle. Three millilitres of blood perfusate was collected from the atrium and lysed two times using ACK lysis buffer (Cambrex). Total RNA was extracted from the remaining cells and used for qRT-PCR as described above. The

presence of human circulating tumour cells was determined by the relative expression of human *GAPDH* normalized to murine  $\beta$ 2-microglobulin.

### ***Trans-endothelial migration assays***

HUVECs were seeded into gelatin-coated Fluoro-Blok trans-well inserts (3  $\mu$ m pore size, BD Falcon) at 100,000 cells per well, and allowed to grow to confluence for 4 days. Tumor cells were pulsed with 5  $\mu$ M cell tracker green (Invitrogen) for 30 min before being conditioned overnight in 0.2% FBS ECM media without growth factors. The next day, 50,000 tumour cells were seeded into trans-well inserts with confluent endothelial monolayer, and the wells were fixed in 4% paraformaldehyde after 8 h. Cells on the apical side of each insert were scraped off and the trans-well membrane mounted onto slides. Migration to the basolateral side of the membrane was visualized with a Zeiss AxioObserver inverted immunofluorescent microscope at 20x magnification. Pictures of 5 random fields across three replicate wells were captured for quantification using Volocity software. In general, 8-10 cells per field were seen to migrate through an endothelial barrier. Migration of the indicated lines was plotted as a percentage of migrating LM2 control cells.

## Supplemental Figures

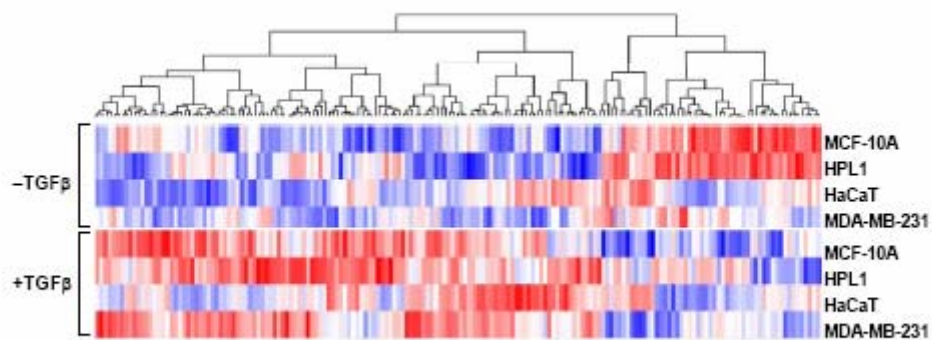

**Figure S1** Heat map representing the raw expression values of the 153 gene TBRS in the four epithelial cell lines with or without TGF $\beta$  treatment.

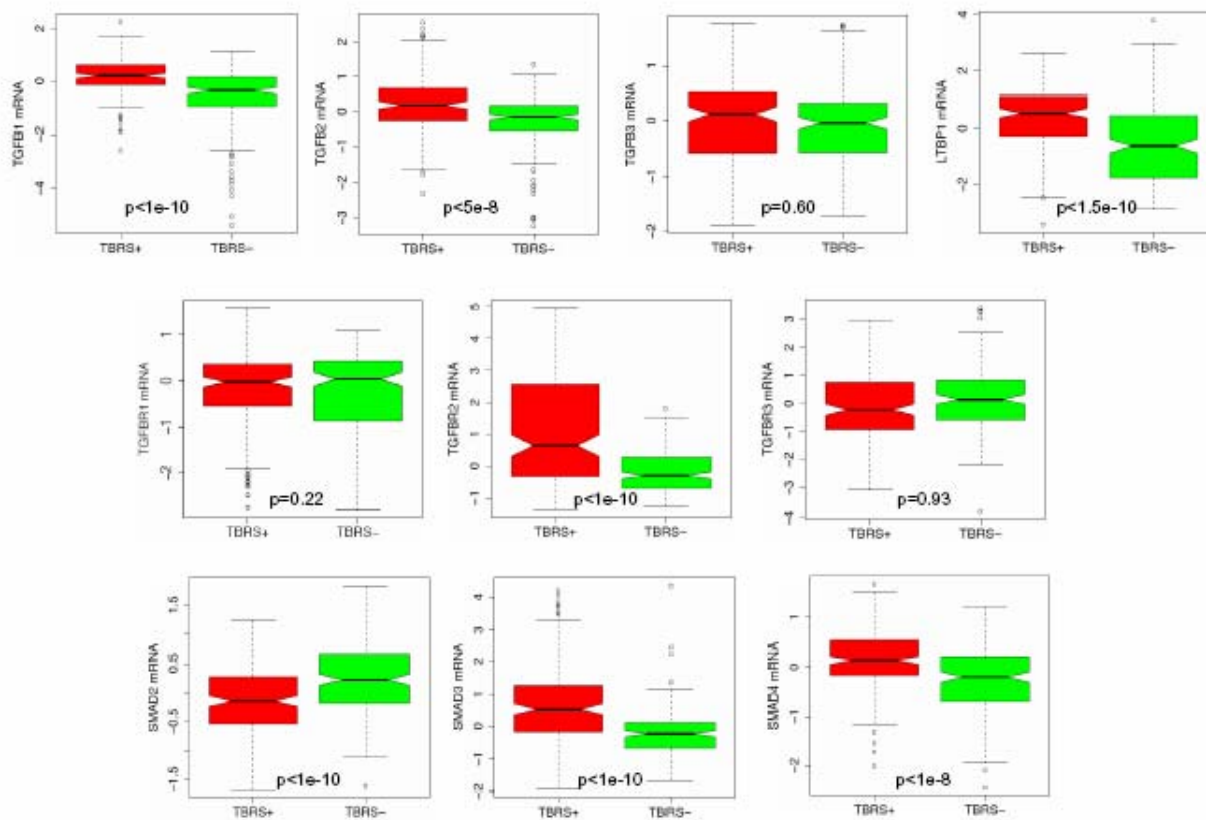

**Figure S2** Box-and-whisker plots comparing the RNA expression of TGFβ1, TGFβ2, TGFβ3, and LTBP1 in TBR5 positive or negative primary breast tumors.

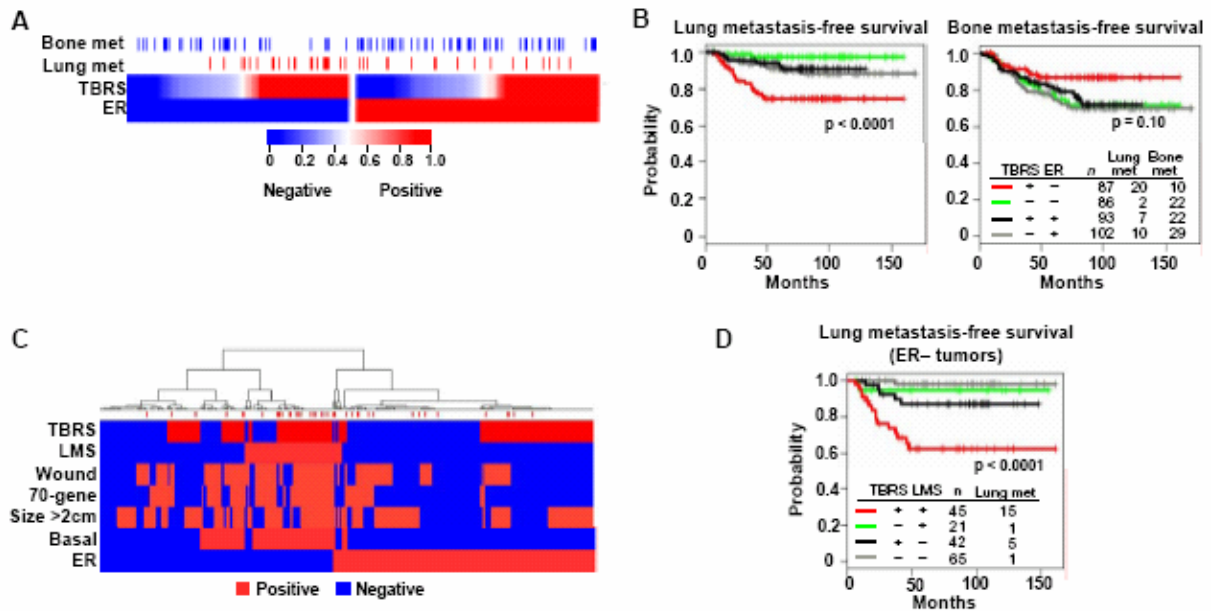

**Figure S3** Analysis of Figure 1 data using an ER status designated by microarray probe levels rather than the clinical designations

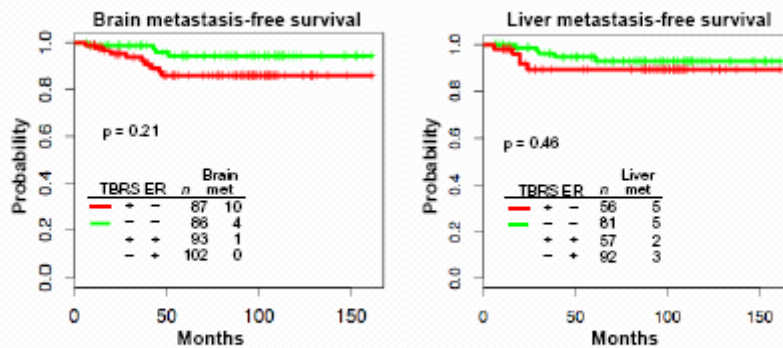

**Figure S4** Kaplan-Meier curves of brain and liver metastasis-free survival from ER negative breast cancer patients either TBR5 positive or negative.



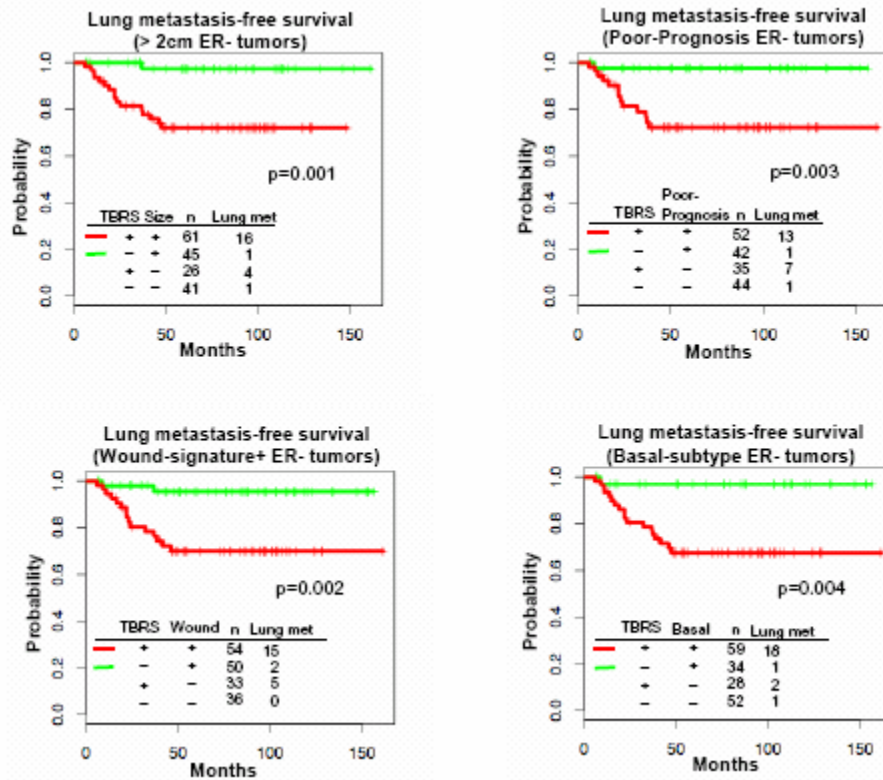

**Figure S5** Kaplan-Meier curves of ER negative breast cancer patients comparing TBR status and other markers of poor clinical outcome such as large size, poor-prognosis signature positive, wound signature positive, and basal molecular subtype tumor designation.

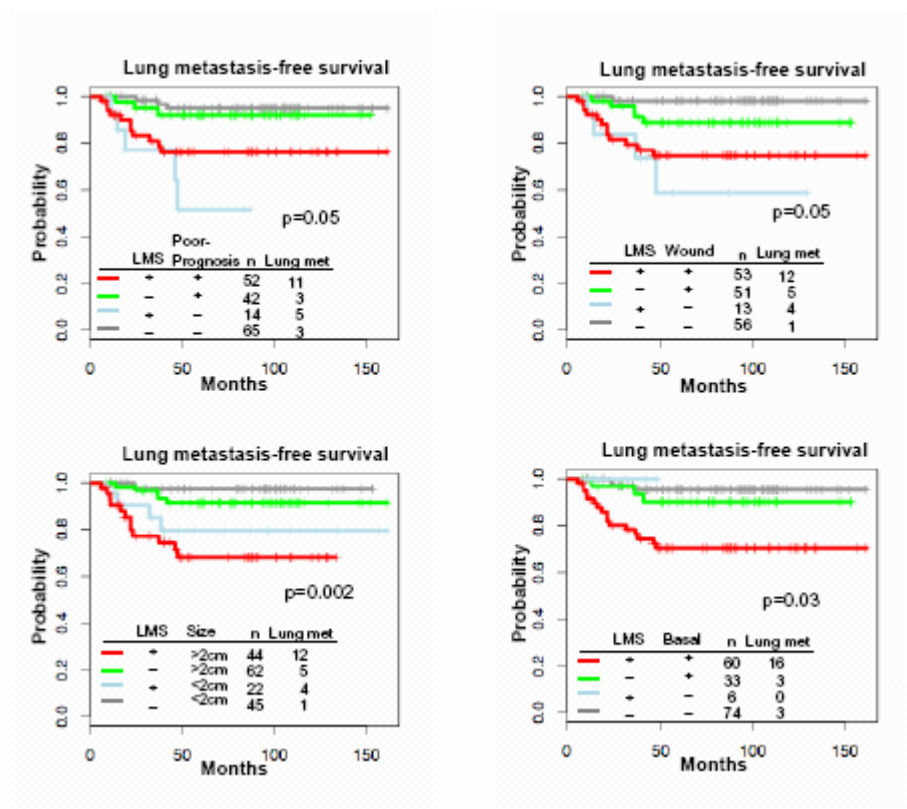

**Figure S6** Kaplan-Meier curves of breast cancer patients comparing LMS status and other markers of poor clinical outcome such as large size, poor-prognosis signature positive, wound signature positive, and basal molecular subtype designation.

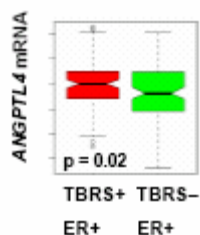

**Figure S7** Box-and-whisker plot of ER positive primary breast cancer comparing the expression of *ANGPTL4* in primary tumors that are either TBR5 positive or negative

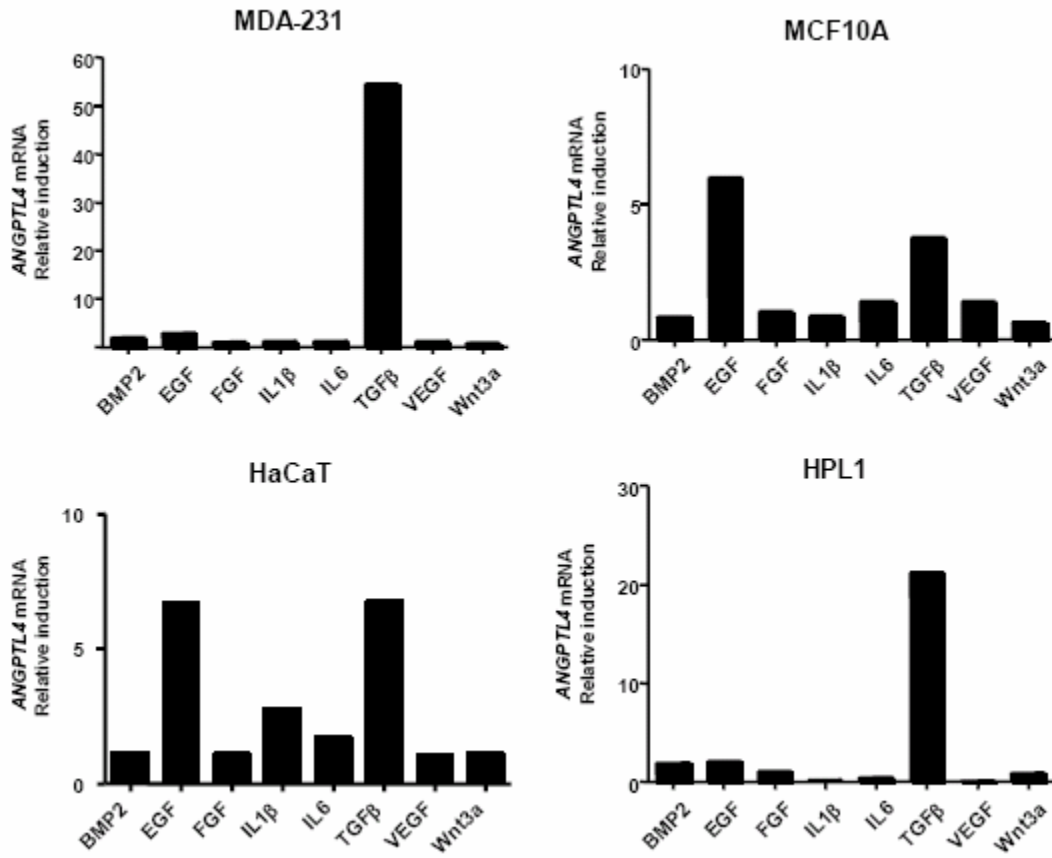

**Figure S8** The four epithelial cell lines were treated with the indicated cytokines for 3h. ANGPTL4 mRNA fold induction are plotted relative to untreated samples.

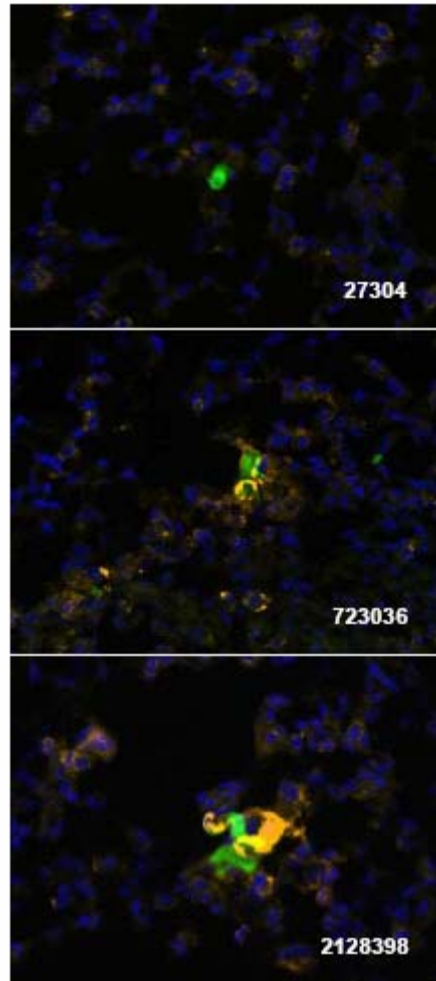

**Figure S9** Representative images used in the quantification of in vivo permeability. Top image is representative of a low level of extravasated rhodamine-dextran, middle image corresponds to a mean level of extravasated dextran, while bottom image is that of cell inducing high levels of permeability and as a result dextran extravasation.

**Table S1** The 153 genes in the TBRS. Gene symbols, gene description, and TGF $\beta$  induction levels are displayed.

| Probes      | MDA-MB-231 | HaCaT | HPL1  | MCF10A | Symbol   |
|-------------|------------|-------|-------|--------|----------|
| 213497_at   | 1.88       | 2.14  | 2.24  | 1.53   | ABTB2    |
| 206466_at   | 1.09       | 2.90  | 17.93 | 1.18   | ACSBG1   |
| 222090_at   | 0.97       | 0.55  | 0.44  | 0.46   | ADCK2    |
| 206170_at   | 0.37       | 0.40  | 0.73  | 0.52   | ADRB2    |
| 207294_at   | 0.98       | 0.69  | 0.35  | 0.06   | AGTR2    |
| 221008_s_at | 1.01       | 0.76  | 0.15  | 0.34   | AGXT2L1  |
| 220842_at   | 1.01       | 1.03  | 0.13  | 0.04   | AHI1     |
| 204174_at   | 1.28       | 1.36  | 2.19  | 2.02   | ALOX5AP  |
| 222108_at   | 4.26       | 1.81  | 5.54  | 1.51   | AMIGO2   |
| 217630_at   | 1.02       | 0.53  | 0.16  | 0.47   | ANGEL2   |
| 221009_s_at | 7.58       | 2.18  | 40.35 | 6.26   | ANGPTL4  |
| 207087_x_at | 1.02       | 1.23  | 7.13  | 4.36   | ANK1     |
| 217888_s_at | 2.23       | 1.02  | 1.45  | 2.01   | ARFGAP1  |
| 207606_s_at | 0.40       | 1.10  | 0.50  | 0.54   | ARHGAP12 |
| 212614_at   | 0.40       | 0.41  | 0.31  | 0.42   | ARID5B   |
| 217579_x_at | 1.04       | 1.69  | 9.19  | 2.77   | ARL6IP2  |
| 216197_at   | 1.07       | 0.64  | 0.40  | 0.05   | ATF7IP   |
| 218631_at   | 0.49       | 0.76  | 0.42  | 0.37   | AVPI1    |
| 220470_at   | 1.13       | 1.05  | 5.04  | 4.41   | BET1L    |
| 201169_s_at | 3.67       | 2.21  | 9.39  | 2.27   | BHLHB2   |
| 201170_s_at | 2.99       | 3.37  | 7.51  | 2.45   | BHLHB2   |
| 206119_at   | 1.15       | 1.66  | 2.13  | 4.44   | BHMT     |
| 209920_at   | 1.72       | 2.35  | 2.18  | 1.29   | BMPR2    |
| 210214_s_at | 2.22       | 1.45  | 2.14  | 2.61   | BMPR2    |
| 206787_at   | 0.98       | 0.72  | 0.12  | 0.06   | BRDT     |
| 218723_s_at | 0.50       | 0.56  | 0.05  | 0.24   | C13orf15 |
| 217508_s_at | 1.87       | 1.73  | 2.62  | 1.47   | C18orf25 |
| 221533_at   | 1.18       | 1.18  | 2.04  | 3.22   | C3orf28  |
| 219474_at   | 2.00       | 1.80  | 2.46  | 2.14   | C3orf52  |
| 212923_s_at | 2.12       | 2.21  | 1.61  | 1.52   | C6orf145 |
| 220513_at   | 1.09       | 1.95  | 7.90  | 2.09   | C6orf148 |
| 209688_s_at | 1.63       | 1.36  | 2.07  | 2.30   | CCDC93   |
| 219774_at   | 2.14       | 1.26  | 1.04  | 2.52   | CCDC93   |
| 203645_s_at | 0.96       | 0.76  | 0.36  | 0.15   | CD163    |
| 208592_s_at | 1.23       | 1.37  | 4.40  | 4.29   | CD1E     |
| 211861_x_at | 1.09       | 0.68  | 0.48  | 0.08   | CD28     |
| 202284_s_at | 3.18       | 2.70  | 2.44  | 1.11   | CDKN1A   |
| 218929_at   | 0.59       | 0.96  | 0.37  | 0.47   | CDKN2AIP |
| 203973_s_at | 0.21       | 0.57  | 0.44  | 0.53   | CEBPD    |
| 207331_at   | 1.08       | 2.05  | 10.46 | 1.02   | CENPF    |
| 207980_s_at | 0.12       | 0.34  | 0.17  | 0.23   | CITED2   |
| 209357_at   | 0.13       | 0.19  | 0.22  | 0.19   | CITED2   |
| 205295_at   | 1.11       | 0.65  | 0.47  | 0.23   | CKMT2    |
| 202310_s_at | 4.75       | 1.33  | 1.90  | 5.05   | COL1A1   |

|             |      |      |      |      |          |
|-------------|------|------|------|------|----------|
| 211980_at   | 2.07 | 1.47 | 2.64 | 4.02 | COL4A1   |
| 211981_at   | 1.84 | 1.40 | 2.99 | 2.27 | COL4A1   |
| 211964_at   | 1.27 | 1.19 | 2.08 | 2.08 | COL4A2   |
| 221900_at   | 1.21 | 1.10 | 2.01 | 3.43 | COL8A2   |
| 209101_at   | 4.01 | 5.88 | 2.12 | 5.20 | CTGF     |
| 206775_at   | 1.22 | 1.07 | 3.13 | 2.26 | CUBN     |
| 203923_s_at | 1.13 | 0.76 | 0.07 | 0.19 | CYBB     |
| 202887_s_at | 0.50 | 0.93 | 0.79 | 0.47 | DDIT4    |
| 215252_at   | 1.12 | 1.56 | 2.08 | 3.67 | DNAJC7   |
| 40612_at    | 0.94 | 0.55 | 0.15 | 0.30 | DOPEY1   |
| 218995_s_at | 3.76 | 2.13 | 1.50 | 1.03 | EDN1     |
| 206127_at   | 2.01 | 1.56 | 2.11 | 1.35 | ELK3     |
| 221773_at   | 2.09 | 1.90 | 3.03 | 1.62 | ELK3     |
| 201328_at   | 1.72 | 3.35 | 2.86 | 6.83 | ETS2     |
| 201329_s_at | 1.75 | 2.65 | 1.72 | 3.95 | ETS2     |
| 219427_at   | 0.61 | 0.70 | 0.50 | 0.39 | FAT4     |
| 204988_at   | 1.01 | 0.55 | 0.18 | 0.36 | FGB      |
| 218818_at   | 2.21 | 1.19 | 1.60 | 2.51 | FHL3     |
| 204135_at   | 2.28 | 1.38 | 1.23 | 2.44 | FILIP1L  |
| 220326_s_at | 1.30 | 1.58 | 2.06 | 2.10 | FLJ10357 |
| 58780_s_at  | 1.50 | 1.81 | 2.22 | 2.19 | FLJ10357 |
| 210316_at   | 0.96 | 0.48 | 1.15 | 0.14 | FLT4     |
| 219316_s_at | 0.85 | 0.48 | 0.87 | 0.17 | FLVCR2   |
| 218618_s_at | 2.01 | 1.25 | 1.26 | 2.09 | FNDC3B   |
| 203592_s_at | 1.90 | 2.20 | 3.24 | 1.71 | FSTL3    |
| 209414_at   | 1.45 | 1.17 | 2.08 | 2.73 | FZR1     |
| 209416_s_at | 1.47 | 1.31 | 2.00 | 2.02 | FZR1     |
| 207574_s_at | 3.88 | 3.79 | 2.80 | 1.45 | GADD45B  |
| 209304_x_at | 3.37 | 3.21 | 2.45 | 1.30 | GADD45B  |
| 209305_s_at | 3.38 | 3.06 | 2.58 | 1.11 | GADD45B  |
| 215248_at   | 1.16 | 1.21 | 2.99 | 7.32 | GRB10    |
| 214438_at   | 1.17 | 2.07 | 1.55 | 4.48 | HLX      |
| 203665_at   | 3.05 | 1.29 | 6.19 | 1.70 | HMOX1    |
| 204111_at   | 1.02 | 0.65 | 0.30 | 0.19 | HNMT     |
| 205580_s_at | 2.08 | 1.14 | 2.06 | 1.47 | HRH1     |
| 208937_s_at | 1.04 | 0.54 | 0.38 | 0.34 | ID1      |
| 206924_at   | 9.37 | 2.46 | 4.91 | 2.70 | IL11     |
| 207952_at   | 1.04 | 0.65 | 0.66 | 0.12 | IL5      |
| 204686_at   | 0.41 | 0.80 | 0.67 | 0.50 | IRS1     |
| 209098_s_at | 2.26 | 2.06 | 1.76 | 2.45 | JAG1     |
| 41387_r_at  | 1.22 | 1.64 | 2.02 | 2.06 | JMJD3    |
| 201464_x_at | 2.19 | 2.15 | 2.62 | 1.82 | JUN      |
| 201466_s_at | 2.81 | 2.58 | 5.10 | 2.65 | JUN      |
| 201473_at   | 7.33 | 2.65 | 8.17 | 1.87 | JUNB     |
| 218651_s_at | 2.19 | 3.08 | 3.96 | 2.86 | LARP6    |
| 221011_s_at | 2.32 | 1.87 | 5.40 | 6.95 | LBH      |
| 218604_at   | 1.62 | 2.08 | 2.67 | 1.23 | LEMD3    |
| 218574_s_at | 3.41 | 1.13 | 5.25 | 1.67 | LMCD1    |
| 204089_x_at | 1.40 | 1.56 | 2.18 | 2.04 | MAP3K4   |
| 208210_at   | 1.00 | 0.69 | 0.21 | 0.41 | MAS1     |

|             |      |       |       |       |           |
|-------------|------|-------|-------|-------|-----------|
| 214696_at   | 2.02 | 1.46  | 2.26  | 1.51  | MGC14376  |
| 202519_at   | 2.05 | 1.67  | 1.35  | 2.54  | MLXIP     |
| 216303_s_at | 1.02 | 0.58  | 0.52  | 0.34  | MTMR1     |
| 213906_at   | 0.41 | 0.85  | 0.83  | 0.42  | MYBL1     |
| 202431_s_at | 1.02 | 0.40  | 0.39  | 0.37  | MYC       |
| 201496_x_at | 1.06 | 0.66  | 0.11  | 0.31  | MYH11     |
| 218149_s_at | 0.49 | 0.84  | 0.72  | 0.30  | NA        |
| 207760_s_at | 2.50 | 1.11  | 2.43  | 1.91  | NCOR2     |
| 202607_at   | 1.35 | 1.11  | 4.21  | 2.02  | NDST1     |
| 202150_s_at | 2.74 | 3.08  | 3.05  | 3.56  | NEDD9     |
| 201695_s_at | 2.12 | 1.26  | 1.14  | 2.08  | NP        |
| 206699_x_at | 1.00 | 1.43  | 2.09  | 22.54 | NPAS1     |
| 209120_at   | 0.19 | 0.64  | 0.49  | 0.34  | NR2F2     |
| 215073_s_at | 0.32 | 0.60  | 0.32  | 0.40  | NR2F2     |
| 213824_at   | 0.91 | 0.71  | 0.50  | 0.23  | OLIG2     |
| 221868_at   | 1.08 | 0.61  | 0.32  | 0.18  | PAIP2B    |
| 206594_at   | 1.05 | 1.80  | 3.47  | 2.08  | PASK      |
| 221918_at   | 2.17 | 2.27  | 1.34  | 1.61  | PCTK2     |
| 205463_s_at | 2.30 | 1.53  | 7.00  | 1.73  | PDGFA     |
| 218691_s_at | 2.43 | 1.50  | 18.06 | 1.15  | PDLIM4    |
| 202464_s_at | 2.02 | 2.15  | 1.83  | 1.65  | PFKFB3    |
| 212134_at   | 2.06 | 1.36  | 2.85  | 1.96  | PHLDB1    |
| 204612_at   | 1.31 | 2.09  | 1.15  | 8.96  | PKIA      |
| 204958_at   | 1.20 | 1.48  | 6.24  | 2.08  | PLK3      |
| 209740_s_at | 0.87 | 0.83  | 0.49  | 0.24  | PNPLA4    |
| 218849_s_at | 2.22 | 1.41  | 2.83  | 1.57  | PPP1R13L  |
| 202879_s_at | 1.29 | 2.10  | 1.42  | 2.16  | PSCD1     |
| 202880_s_at | 1.22 | 2.09  | 2.08  | 2.09  | PSCD1     |
| 206977_at   | 0.96 | 1.23  | 15.95 | 4.12  | PTH       |
| 219812_at   | 1.18 | 1.19  | 2.43  | 2.52  | PVRIG     |
| 216719_s_at | 1.06 | 0.50  | 0.16  | 0.93  | RAB11FIP4 |
| 219440_at   | 1.10 | 0.79  | 0.21  | 0.16  | RAI2      |
| 203749_s_at | 3.39 | 1.93  | 4.10  | 1.46  | RARA      |
| 206850_at   | 1.23 | 1.34  | 4.49  | 2.30  | RASL10A   |
| 203748_x_at | 1.42 | 1.33  | 2.02  | 2.21  | RBMS1     |
| 207266_x_at | 1.42 | 1.36  | 2.18  | 2.09  | RBMS1     |
| 209868_s_at | 1.42 | 1.37  | 2.07  | 2.06  | RBMS1     |
| 212099_at   | 3.92 | 2.05  | 4.73  | 3.16  | RHOB      |
| 205158_at   | 0.71 | 0.78  | 0.48  | 0.26  | RNASE4    |
| 202627_s_at | 3.67 | 11.31 | 7.36  | 7.64  | SERPINE1  |
| 202656_s_at | 0.20 | 0.77  | 0.56  | 0.45  | SERTAD2   |
| 202657_s_at | 0.23 | 0.59  | 0.38  | 0.53  | SERTAD2   |
| 201739_at   | 3.23 | 2.29  | 4.88  | 1.11  | SGK       |
| 206675_s_at | 1.26 | 4.80  | 8.33  | 16.58 | SKIL      |
| 217591_at   | 2.02 | 3.25  | 3.13  | 2.52  | SKIL      |
| 217685_at   | 0.96 | 0.76  | 0.44  | 0.11  | SLC16A3   |
| 207298_at   | 1.23 | 1.19  | 3.02  | 2.01  | SLC17A3   |
| 204790_at   | 4.17 | 5.95  | 10.80 | 6.39  | SMAD7     |
| 210357_s_at | 1.60 | 2.29  | 2.40  | 3.03  | SMOX      |
| 207390_s_at | 1.40 | 1.36  | 2.01  | 3.00  | SMTN      |

|             |      |      |       |       |           |
|-------------|------|------|-------|-------|-----------|
| 212666_at   | 1.62 | 1.66 | 2.30  | 2.02  | SMURF1    |
| 212668_at   | 1.32 | 2.10 | 1.24  | 4.46  | SMURF1    |
| 215458_s_at | 1.49 | 1.31 | 2.00  | 2.36  | SMURF1    |
| 219480_at   | 2.01 | 1.38 | 6.11  | 0.90  | SNAI1     |
| 219257_s_at | 2.36 | 1.66 | 2.11  | 2.09  | SPHK1     |
| 209875_s_at | 1.00 | 0.90 | 0.15  | 0.23  | SPP1      |
| 219677_at   | 2.15 | 1.26 | 1.27  | 2.11  | SPSB1     |
| 217991_x_at | 1.43 | 1.10 | 2.43  | 2.29  | SSBP3     |
| 216917_s_at | 1.05 | 0.50 | 0.72  | 0.20  | SYCP1     |
| 212796_s_at | 1.73 | 1.29 | 1.81  | 2.26  | TBC1D2B   |
| 211462_s_at | 1.04 | 1.24 | 8.78  | 2.08  | TBL1Y     |
| 208398_s_at | 2.09 | 1.40 | 1.33  | 2.17  | TBPL1     |
| 221866_at   | 1.47 | 1.35 | 5.80  | 2.91  | TFEB      |
| 50221_at    | 1.82 | 2.25 | 4.16  | 2.41  | TFEB      |
| 211154_at   | 0.99 | 0.49 | 0.80  | 0.08  | THPO      |
| 217875_s_at | 5.44 | 2.96 | 31.67 | 1.62  | TMEPAI    |
| 208296_x_at | 2.11 | 1.33 | 1.24  | 2.01  | TNFAIP8   |
| 218368_s_at | 1.36 | 2.00 | 2.11  | 1.39  | TNFRSF12A |
| 210987_x_at | 2.00 | 1.27 | 2.11  | 1.43  | TPM1      |
| 212664_at   | 1.08 | 1.66 | 2.37  | 3.15  | TUBB4     |
| 205807_s_at | 2.92 | 1.85 | 2.23  | 2.75  | TUFT1     |
| 221098_x_at | 1.03 | 0.50 | 0.73  | 0.06  | UTP14A    |
| 211527_x_at | 2.56 | 1.45 | 8.61  | 21.20 | VEGFA     |
| 221423_s_at | 2.00 | 1.11 | 1.19  | 2.16  | YIPF5     |
| 208078_s_at | 3.17 | 2.49 | 2.47  | 2.05  | ZEB1      |
| 211962_s_at | 2.07 | 2.07 | 1.44  | 1.14  | ZFP36L1   |
| 211965_at   | 1.56 | 2.28 | 1.43  | 3.34  | ZFP36L1   |
| 203520_s_at | 0.81 | 0.82 | 0.50  | 0.16  | ZNF318    |
| 221123_x_at | 0.42 | 0.96 | 0.93  | 0.50  | ZNF395    |
| 206810_at   | 1.02 | 0.56 | 0.23  | 0.25  | ZNF44     |



**Table S2** TBRS status was assessed in each of the breast cancer metastasis samples submitted for microarray analysis. The percentage of TBRS positive samples in each metastasis site is shown.

| Site         | TBRS+ (%)  |
|--------------|------------|
| Lung         | 14/18 (78) |
| Bone         | 8/16 (50)  |
| Brain        | 6/19 (32)  |
| Liver        | 5/5 (100)  |
| Other sites* | 5/9 (56)   |
| All sites    | 38/67 (58) |

\* Includes ovary, duodenum and chest wall

**Table S3** Univariate and multivariate analyses correlating TGF $\beta$  pathway components and incidence of lung metastasis in the breast cancer patient cohorts. P-values for these associations are listed.

|                                         | All tumors         | ER- tumors          |
|-----------------------------------------|--------------------|---------------------|
| <i>TGFBR1</i>                           | 0.7740             | 0.2560              |
| <i>TGFBR2</i>                           | 0.1700             | 0.0110              |
| <i>TGFB1</i>                            | 0.5460             | 0.1800              |
| <i>TGFB2</i>                            | 0.8750             | 0.5120              |
| <i>TGFB3</i>                            | 0.001 <sup>a</sup> | 0.0271 <sup>a</sup> |
| <i>Smad2</i>                            | 0.1990             | 0.0425              |
| <i>Smad3</i>                            | 0.3090             | 0.0111              |
| <i>Smad4</i>                            | 0.0937             | 0.1780              |
| <i>TGFBR2+Smad3</i> <sup>b</sup>        | 0.3380             | 0.0106              |
| All (except <i>TGFB3</i> ) <sup>b</sup> | 0.6260             | 0.0533              |
| TBRS                                    | 0.0133             | < 0.0001            |

a: Negative correlation

b: Multivariate analyses using Cox proportional hazards regression model
